# Supplementary material for: Stripping back the Modern to reveal Cretaceous climate and temperature gradient underneath
Source: Copernicus journal article supplement (doi:10.5194/cp-2019-166), 2020-01-14

Supplementary online materials for

## **Stripping back the Modern to reveal Cretaceous climate and temperature gradient underneath**

M.Laugié<sup>1</sup>, Y.Donnadieu<sup>1</sup>, JB.Ladant<sup>2</sup>, M.Green<sup>3</sup>, L. Bopp<sup>4,5</sup> and F. Raison<sup>6</sup>.

<sup>1</sup>Aix Marseille Univ, CNRS, IRD, INRA, Coll. France, CEREGE, Aix-en-Provence, France

<sup>2</sup>Department of Earth and Environmental Sciences, University of Michigan, Ann Arbor, MI, USA

<sup>3</sup>Bangor University, School of Ocean Sciences, Menai Bridge, UK.

<sup>4</sup>Ecole Normale Supérieure (ENS Paris) - Département des Géosciences - France

<sup>5</sup>Laboratoire de Météorologie Dynamique (UMR 8539) (LMD) - Université Pierre et Marie Curie - Paris 6, Institut national des sciences de l'Univers, École Polytechnique, École des Ponts ParisTech, Centre National de la Recherche Scientifique : UMR8539, École Normale Supérieure - Paris - France

<sup>6</sup>Total EP – R&D Frontier Exploration - France

Correspondence to: M. Laugié ([marielaugie@gmail.com](mailto:marielaugie@gmail.com))

### **Contents**

- Supplementary Figures S1
- Supplementary Tables S1

Table 1 : Description of the PFTs and corresponding theoretical latitudinal distributions

| N° | Description                        | Latitudinal range (North and South) and proportion |
|----|------------------------------------|----------------------------------------------------|
| 1  | Bare soil                          | 20° to 35° → 100%                                  |
| 2  | Tropical broad-leaved evergreen    | 0° to 15° → 75%                                    |
| 3  | Tropical broad-leaved raingreen    | 0° to 15° → 25%                                    |
| 4  | Temperate needleleaf evergreen     | Absent                                             |
| 5  | Temperate broad-leaved evergreen   | 35° to 50° → 70%                                   |
| 6  | Temperate broad-leaved summergreen | 35° to 50° → 30%                                   |
| 7  | Boreal needleleaf evergreen        | Absent                                             |
| 8  | Boreal broad-leaved summergreen    | 50° to 80° → 100%                                  |
| 9  | Boreal needleleaf summergreen      | 80° to 90° → 100%                                  |
| 10 | C3 grass                           | 15° to 20 ° → 100%                                 |
| 11 | C4 grass                           | Absent                                             |
| 12 | C3 agriculture                     | Absent                                             |
| 13 | C4 agriculture                     | Absent                                             |

Figure S1 : Anomaly of zonal annual average of relative humidity (blue curve) and low cloudiness (green curve) for 4X-CRETACEOUS and 4X-NI-PFT-SOIL-SOLAR simulations.

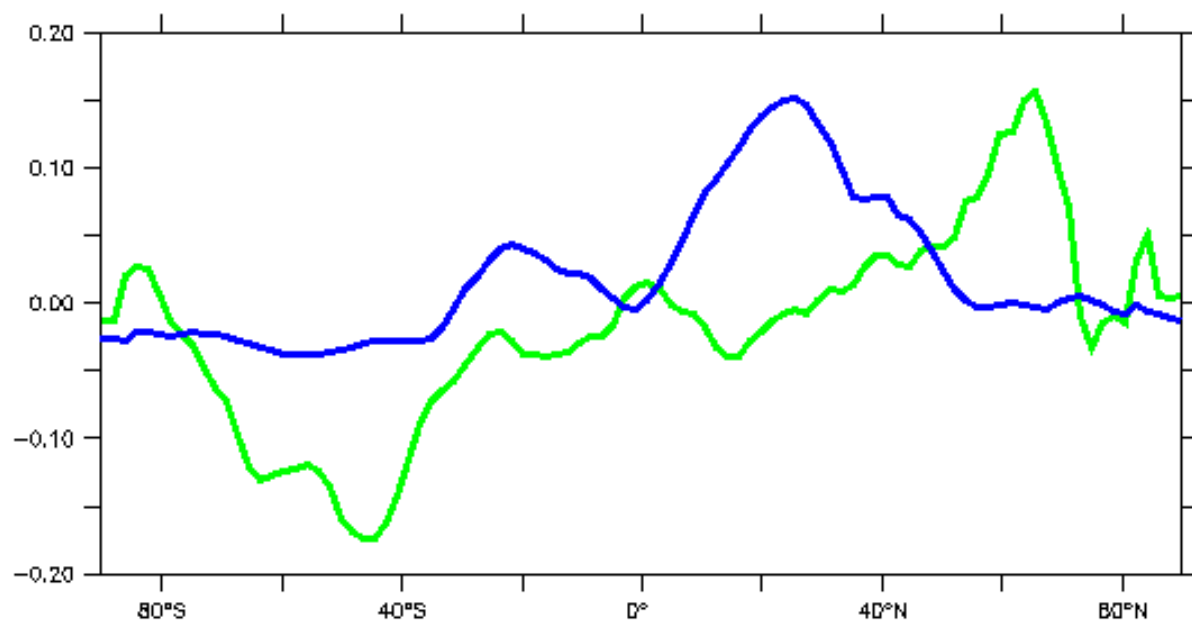

Supplement: Supplementary file 1 [file cp-2019-166-supplement.zip]
