# Supplementary material for: Stripping back the Modern to reveal Cretaceous climate and temperature gradient underneath
Source: Copernicus journal article supplement (doi:10.5194/cp-2019-166), 2020-01-14
Supplement: Supplementary file 1 [file SupplementaryData1-Proxies-Paleotemp.xlsx]

## Sheet: Ocean
Source	Type	Location	Paleo Lat	Paleo Lon	Proxy Temp (°C)	Proxy Uncertain (+/-) (°C)					Paleolat	Temp
Huber et al., (1995)	Planktonic forams	Naturaliste Plateau	-56.6043	88.869	16.5238	2.9					-56.6043	16.5238
Huber et al., (1995)	Planktonic forams	Falkland Plateau	-54.1654	-13.8349	22.8946	2.9					-54.1654	22.8946
Price et al., (2012)	belemnite rostra	Boologooro	-48.6747	97.6509	12.6732	1.6					-48.6747	12.6732
Clarke and Jenkyns, (1999)	Composite forams	Exmouth Plateau	-43.9225	97.8804	21.8854	2.9					-43.9225	21.8854
Henderson and Price, (2012)	Mollusk	Northern Australia	-40.5731	123.582	25.0743	1.6					-40.5731	25.0743
Henderson and Price, (2012)	Mollusk	Northern Australia	-40.5731	123.582	30.9697	1.6					-40.5731	30.9697
Kolodny and Luz (1991)	Tooth enamel	Angola	-23		28.9	1.4					-23	28.9
Price et al., (1998)	Planktonic forams	Western Mid-Pacific Mtns	-16.3	-143.328	26.1576	2.9					-55	26.5
Price and Hart, (2001)	Planktonic forams	Western Mid-Pacific Mtns	-16.3	-143.328	25.8136	2.9
Price et al., (1998)	Planktonic forams	Shatsky Rise	-5.19084	-158.261	26.487	2.9					21.8	36
Forster et al., (2007a)	TEX86	Demerara Rise	5	-26	33.6	2.5					26.3551	27.3066
Bice et al., (2006)	Planktonic forams	Demerara Rise	5.68428	-26.6315	30.3566	2.9					26.5981	29.5547
Friedrich et al., (2008)	Planktonic forams	Demerara Rise	5.68428	-26.6315	31.0758	2.9					26.6794	24.813
Moriya et al., (2007)	Planktonic forams	Demerara Rise	5.68428	-26.6315	30.7117	2.9					26.6794	25.6217
Norris et al., (2002)	Planktonic forams	Demerara Rise	5.68428	-26.6315	30.2066	2.9					30.2121	31.2263
Sellwood et al., (1994)	Planktonic forams	Demerara Rise	5.68428	-26.6315	27.2626	2.9					31.2541	36.4123
Kolodny and Raab (1988)	Tooth enamel	Egypt	8.3		36	1.7					37.2632	22.3881
Schouten et al., (2003)	TEX86	Cape Verde Basin	9.26629	-21.3135	35.9774	2.5					37.2632	23.1816
Forster et al., (2007a)	TEX86	Cape Verde Basin	9.26629	-21.3135	35.4448	2.5					38.4	18.5
Kolodny and Luz (1991)	Tooth enamel	Israel	12		33.6	1.6					38.4	26.4
Kolodny and Raab (1988)	Tooth enamel	Israel	12		35.3	1.6					38.4	28.1
Kolodny and Raab (1988)	Tooth enamel	Israel	12		33.6	1.6					38.4	25.1
Kolodny and Raab (1988)	Tooth enamel	Israel	12		33.1	1.6					38.4	24.2
Kolodny and Raab (1988)	Tooth enamel	Israel	12		33.6	1.6					38.4	29
Kolodny and Raab (1988)	Tooth enamel	Israel	12		35.3	1.6					38.4	21.6
El-Shazy et al., (2011)	Rudist	Egypt	14.0383	30.0471	40.9584	1.6					38.5746	35.5068
Pucéat et al., (2003)	Tooth enamel	Morocco	21.8		36	1.7					39.8815	24.9717
Sellwood et al., (1994)	Planktonic forams	Mazagan Plateau	26.3551	-4.12427	27.3066	2.9					41.8838	19.3926
Norris and Wilson, (1998)	Planktonic forams	Blake Plateau	26.5981	-41.8677	29.5547	2.9					42.9707	15.3244
Ando et al., (2009)	Planktonic forams	Blake Nose	26.6794	-41.3447	24.813	2.9					43	16.1
Huber et al., (2002)	Planktonic forams	Blake Nose	26.6794	-41.3447	25.6217	2.9					43.4466	15.0528
Steuber et al., (2005)	Rudist	Croatia	30.2121	22.1464	31.2263	1.6					43.4466	12.2031
Schouten et al., (2003)	TEX86	North Atlantic	31.2541	-34.6649	36.4123	2.5					44	19.1
Voigt et al., (2003)	Brachiopods	Tagle East	37.2632	3.35905	22.3881	1.6					44	21.8
Voigt et al., (2004)	Brachiopods	Spain	37.2632	3.35905	23.1816	1.6					44	19
Pucéat et al., (2003)	Tooth enamel	France	38.4		18.5	1.1					44	26.5
Pucéat et al., (2003)	Tooth enamel	France	38.4		26.4	1.4					44	31.8
Pucéat et al., (2003)	Tooth enamel	France	38.4		28.1	1.4					45.2168	30.0894
Pucéat et al., (2003)	Tooth enamel	France	38.4		25.1	1.3					70	14
Pucéat et al., (2003)	Tooth enamel	France	38.4		24.2	1.3
Pucéat et al., (2003)	Tooth enamel	France	38.4		29	1.5
Pucéat et al., (2003)	Tooth enamel	France	38.4		21.6	1.2
Sinninghe Damsté et al., (2010)	TEX86	Newfoundland Basin	38.5746	-9.9191	35.5068	2.5
Steuber et al., (2005)	Rudist	France	39.8815	5.16812	24.9717	1.6
Gustafsson et al., (2003)	Planktonic forams	Goban Spur	41.8838	-6.2527	19.3926	2.9
Voigt et al., (2004)	Brachiopods	France	42.9707	7.73394	15.3244	1.6
Puceat et al., (2007)	Tooth enamel	Germany	43		16.1	1.1
Voigt et al., (2003)	Brachiopods	England	43.4466	5.67362	15.0528	1.6
Voigt et al., (2004)	Brachiopods	England	43.4466	5.67362	12.2031	1.6
Puceat et al., (2007)	Tooth enamel	Poland	44		19.1	1.1
Puceat et al., (2007)	Tooth enamel	Poland	44		21.8	1.2
Puceat et al., (2007)	Tooth enamel	Poland	44		19	1.1
Puceat et al., (2007)	Tooth enamel	Poland	44		26.5	1.4
Puceat et al., (2007)	Tooth enamel	Poland	44		31.8	1.5
El-Shazy et al., (2011)	Rudist	Czech Republic	45.2168	19.6186	30.0894	1.6
Huber et al 2018	Foraminifera	DSDP 511, 258	-60		25-28

## Sheet: Atmosphere
Source	Location	Age (Ma)	MAT (°C)	WMMT (°C)	CMMT (°C)	Paleolatitude				Paleolat	temp
parrish et al., 1998	New Zealand	95-95	10 +-3		5,7 +- 3,3	-80				-80	10
Hayes 2000	Antarctica	88-85	15-23			-65				-65	19
Varela et al., 2018	Patagonia	100-90	11-14 +- 2			-60				-60	12.5
Fletcher 2014	Queensland	95	13,6 +- 2	21,2 +- 2,7	6,7 +- 3,4	-50				-50	13.6
Cantrill 1995	Southern Gondwana	110	13-27			-40				-40	20
Spicer and Herman 2010	Tuscaloosa	95	19.7	24.5	15.1	32
Spicer and Herman 2010	Woodbine	95	19.4	23.5	15.4	32				32	19.7
Arens & Harris, 2015	Utah	100	19-26			40				32	19.4
Spicer and Herman 2010	Chuchle	95	18.7	27.3	10.4	41				40	22.5
Spicer and Herman 2010	Vyshehor	95	17	26.2	8.3	41				41	18.7
Spicer and Herman 2010	Peruc	95	16.2	26.2	7.2	41				41	17
Spicer and Herman 2010	Terekty Sai	95	15.3	22.2	9.2	42				41	16.2
Spicer and Herman 2010	Vilui	95	12.8	21	5.3	68				42	15.3
Spicer and Herman 2010	Arman	88	8.2	18.7	-2	68				68	12.8
Spicer and Herman 2010	Kamchatka	90	7.7	17.7	-2.4	72				68	8.2
Spicer and Herman 2010	Kamchatka	88	9.6	18.3	1.1	72				72	7.7
Spicer and Herman 2010	Yukon	90	14.3	21.1	8	73				72	9.6
Spicer and Herman 2010	Tylpegyrgynai	88	8.4	18.8	-1.6	79				73	14.3
Spicer and Herman 2010	N. Alaska	88	13.3	19.1	7.9	80				79	8.4
Spicer and Herman 2010	Grebenka	98	12.9	20.8	5.9	81				80	13.3
Spicer and Herman 2010	Nov. Sibir	90	9.2	17.2	1.1	82				81	12.9
										82	9.2

## Sheet: Gradients
Gradients calculated for atmospheric surface temperature at 2 meters high. Unit = °C per 1° of latitude From 30° to 80° of latitude.										Gradients calculated for sea surface temperature Unit = °C per 1° of latitude From 30° to 80° of latitude.
	Source	Period	Model	CO2 (PAL)	Value North	Value South	Mean				Source	Period	Model	CO2 (PAL)	Value North	Value South	Mean
Modelling Studies	Lunt et al. 2012	Eocene	HadCM3L	2	0.75	0.78	0.765			Modelling Studies	Lunt et al. 2012	Eocene	HadCM3L	2	0.44	0.48	0.46
	Lunt et al. 2012			4	0.72	0.76	0.74							4	0.49	0.51	0.5
	Lunt et al. 2012			6	0.68	0.74	0.71							6	0.5	0.51	0.505
	Lunt et al. 2012		ECHAM5	2	0.5	0.56	0.53						CCSM3_W	4	0.47	0.4	0.435
	Lunt et al. 2012		GISS	4	0.56	0.53	0.545							8	0.43	0.38	0.405
	Lunt et al. 2012		CCSM3_W	4	0.4	0.5	0.45							16	0.4	0.34	0.37
	Lunt et al. 2012			8	0.36	0.49	0.425						CCSM_H	2	0.5	0.42	0.46
	Lunt et al. 2012			16	0.33	0.48	0.405							4	0.48	0.43	0.455
	Lunt et al. 2012		CCSM_H	2	0.45	0.53	0.49							8	0.42	0.4	0.41
	Lunt et al. 2012			4	0.4	0.53	0.465							16	0.39	0.37	0.38
	Lunt et al. 2012			8	0.38	0.5	0.44						ECHAM5	2	0.45	0.4	0.425
	Lunt et al. 2012			16	0.38	0.5	0.44						GISS	4	0.54	0.36	0.45
	Huber & Caballero 2011		CCSM3	16	0.45	0.39	0.42				Zhu et al. 2019		CESM1.2-CAM5	3	0.46	0.4	0.43
	Zhu et al. 2019		CESM1.2-CAM5	3	0.55	0.7	0.625						CESM1.2-CAM5	6	0.38	0.36	0.37
	Zhu et al. 2019			6	0.51	0.62	0.565						CESM1.2-CAM5	9	0.34	0.32	0.33
	Zhu et al. 2019			9	0.49	0.6	0.545				Hutchinson et al. 2018		﻿GFDL CM2.1	1.43	0.52	0.44	0.48
	Upchurch et al. 2016	Maastrichtian	CCSM3	2			0.44							2.86	0.51	0.36	0.435
				6			0.37							5.7	0.42	0.32	0.37
				2	Cloud Param. WarmPole		0.36				Tabor et al. 2016	Maastrichtian	CCSM4	2	0.52	0.43	0.475
				6	Cloud Param. WarmPole		0.32				Tabor et al. 2016		CCSM4	4	0.52	0.42	0.47
	Niezgodski et al. 2017		ECHAM5-MPI-OM	2	0.59	0.72	0.655				Tabor et al. 2016	Cenomanian	CCSM4	4	0.54	0.4	0.47
				3	0.53	0.69	0.61				This study	Cenomanian/Turonian	IPSL-CM5A2	4	0.45	0.39	0.42
				4	0.5	0.68	0.59
				5	0.49	0.68	0.585			Data compilation		Cenomanian/Turonian	Proxies		0.42	0.3	0.36
				6	0.46	0.65	0.555
	This study	Cenomanian/Turonian	IPSL-CM5A2	4	0.49	0.54	0.515
Data compilation		Cenomanian/Turonian	Proxies		0.2	0.18	0.19
